# Supplementary material for: Mechanism of a Novel Carrier Buffer in Arc Atomic Emission Spectroscopy
Source: PubMed Central journal article supplement — ACS Meas Sci Au. 2024 Sep 25;4(6):638–50. doi: 10.1021/acsmeasuresciau.4c00025 (PMC11660001; doi:10.1021/acsmeasuresciau.4c00025), 2024-09-25
Supplement: tg4c00025_si_001.pdf [file tg4c00025_si_001.pdf]

**Supporting Information**

*for*

**Mechanism of a Novel Carrier Buffer in Arc Atomic Emission Spectroscopy**

Zhi-xiong Li<sup>1,2,3</sup>, Bo-yu Du<sup>4</sup>, Lian-kai Zhang<sup>3\*</sup>, Jing-jiang Yang<sup>3</sup>, Shun-rong Xue<sup>1,2</sup>, Gui-ren Chen<sup>3</sup>, Hui Yang<sup>5</sup>, Can-feng Li<sup>3</sup>, Cheng-zhong He<sup>3</sup>, Qian-shu Lu<sup>3</sup>, Song Zhang<sup>3</sup>, Qiang Li<sup>3</sup>.

1 Key Laboratory of Sanjiang Metallogeny and Resources Exploration and Utilization, MNR, Kunming 650051, China.

2 Yunnan Key Laboratory of Sanjiang Metallogeny and Resources Exploration and Utilization, Kunming 650051, China.

3 Kunming Natural Resources Comprehensive Survey Center of China Geological Survey, Kunming 650100, China.

4 Faculty of Metallurgical and Energy Engineering, Kunming University of Science and Technology, Kunming 650093, China.

5 Key Laboratory of Karst Dynamics, Ministry of Natural Resources and Guangxi, Institute of Karst Geology, Chinese Academy of Geological Sciences, Guilin, 541004, China.

\*To whom correspondence should be addressed. E-mail: [lzx101327@gmail.com](mailto:lzx101327@gmail.com) or [zhangliankai@mail.cgs.gov.cn](mailto:zhangliankai@mail.cgs.gov.cn)

After several months of expanded experiments, considering the sensitivity and applicability of the main analytical elements Ag, B, and Sn, the buffer formula was fine-tuned to: Al<sub>2</sub>O<sub>3</sub>, K<sub>2</sub>S<sub>2</sub>O<sub>7</sub>, BaCO<sub>3</sub>, NaF, and auxiliary components SiO<sub>2</sub>, settled S, CaCO<sub>3</sub>, C. The ratio of Fe<sub>2</sub>O<sub>3</sub> and PTFE is 40+20+10+5+8+4+3.7+6+1.8+1.5 (the content of the internal standard GeO<sub>2</sub> accounts for 0.007%), achieving a more ideal detection limit and precision, as well as accuracy (see attached table).

**Scan point 39 (Figure 12)** - EDX analysis results of a fused material in final carrier buffer and GBW07105 (1:1) after reaction.

| Elements | Contents(%) | Calibration contents(%) | Atomic ratios | Converted into oxide contents(%) |        |
|----------|-------------|-------------------------|---------------|----------------------------------|--------|
| O        | 49.15       | 47.05                   | 59.97         | /                                | /      |
| Mg       | 0.18        | 0.18                    | 0.15          | MgO                              | 0.30   |
| Al       | 55.12       | 52.77                   | 39.88         | Al <sub>2</sub> O <sub>3</sub>   | 99.70  |
| 合计       | 104.45      | 100.00                  | 100.00        | /                                | 100.00 |

**Scan point 40 (Figure 12)** - EDX analysis results of a fused material in final carrier buffer and GBW07105 (1:1) after reaction.

| Elements | Contents(%) | Calibration contents(%) | Atomic ratios | Converted into oxide contents(%) |        |
|----------|-------------|-------------------------|---------------|----------------------------------|--------|
| O        | 46.87       | 47.04                   | 59.98         | /                                | /      |
| Mg       | 0.15        | 0.16                    | 0.12          | MgO                              | 0.27   |
| Al       | 52.59       | 52.80                   | 39.90         | Al <sub>2</sub> O <sub>3</sub>   | 99.73  |
| 合计       | 99.61       | 100.00                  | 100.00        | /                                | 100.00 |

**Scan point 41 (Figure 12)** - EDX analysis results of a fused material in final carrier buffer and GBW07105 (1:1) after reaction.

| Elements | Contents(%) | Calibration contents(%) | Atomic ratios | Converted into oxide contents(%) |      |
|----------|-------------|-------------------------|---------------|----------------------------------|------|
| O        | 37.03       | 34.13                   | 57.70         | /                                | /    |
| Mg       | 0.37        | 0.38                    | 0.28          | MgO                              | 0.63 |

|    |        |        |        |                                |        |
|----|--------|--------|--------|--------------------------------|--------|
| Al | 31.61  | 29.02  | 29.17  | Al <sub>2</sub> O <sub>3</sub> | 54.82  |
| Si | 0.58   | 0.59   | 0.46   | SiO <sub>2</sub>               | 1.26   |
| Ca | 11.79  | 10.84  | 7.26   | CaO                            | 15.18  |
| Fe | 0.95   | 0.88   | 0.38   | FeO                            | 1.13   |
| Ba | 26.31  | 24.16  | 4.75   | BaO                            | 26.98  |
| 合计 | 108.64 | 100.00 | 100.00 | /                              | 100.00 |

**Schedule 1. CCD-1 direct-reading emission spectrometer tests experimental data for newly developed carrier buffer agents**

| Sample             | Ag    | B    | Sn   |
|--------------------|-------|------|------|
| KB-1               | 0.036 | 4.13 | 0.55 |
| KB-2               | 0.04  | 3.6  | 0.52 |
| KB-3               | 0.035 | 3.64 | 0.58 |
| KB-4               | 0.035 | 3.81 | 0.62 |
| KB-5               | 0.033 | 3.51 | 0.52 |
| KB-6               | 0.037 | 4.29 | 0.66 |
| KB-7               | 0.037 | 3.92 | 0.67 |
| KB-8               | 0.039 | 3.73 | 0.63 |
| KB-9               | 0.037 | 3.95 | 0.72 |
| KB-10              | 0.036 | 3.56 | 0.57 |
| KB-11              | 0.036 | 4.4  | 0.73 |
| KB-12              | 0.036 | 4.34 | 0.69 |
| average value      | 0.036 | 3.91 | 0.62 |
| standard deviation | 0.002 | 0.32 | 0.07 |

| Sample             | Ag    | B    | Sn    |
|--------------------|-------|------|-------|
| GBW07106-1         | 0.073 | 37.1 | 1.41  |
| GBW07106-2         | 0.072 | 32.5 | 1.51  |
| GBW07106-3         | 0.069 | 33.9 | 1.34  |
| GBW07106-4         | 0.079 | 33.9 | 1.54  |
| GBW07106-5         | 0.078 | 35.6 | 1.61  |
| GBW07106-6         | 0.073 | 34.2 | 1.42  |
| GBW07106-7         | 0.071 | 34.6 | 1.38  |
| GBW07106-8         | 0.075 | 34   | 1.42  |
| GBW07106-9         | 0.087 | 27.9 | 1.47  |
| GBW07106-10        | 0.074 | 36.5 | 1.61  |
| GBW07106-11        | 0.073 | 36.9 | 1.47  |
| GBW07106-12        | 0.077 | 35.4 | 1.43  |
| average value      | 0.075 | 34.4 | 1.47  |
| standard deviation | 0.005 | 2.45 | 0.086 |

|                          |       |      |      |
|--------------------------|-------|------|------|
| 3S                       | 0.006 | 0.96 | 0.21 |
| The detection limit (6S) | 0.012 | 1.92 | 0.42 |
| Detection lower limit    | 0.028 | 4.77 | 0.75 |

|                |       |       |       |
|----------------|-------|-------|-------|
| RSD%           | 6.31  | 7.14  | 5.84  |
| standard value | 0.062 | 34    | 1.3   |
| $\Delta\log C$ | 0.083 | 0.005 | 0.053 |

| Sample             | Ag    | B     | Sn    |
|--------------------|-------|-------|-------|
| GBW07108-1         | 0.04  | 10.2  | 0.89  |
| GBW07108-2         | 0.039 | 11.22 | 0.67  |
| GBW07108-3         | 0.04  | 9.62  | 0.76  |
| GBW07108-4         | 0.037 | 7.63  | 0.81  |
| GBW07108-5         | 0.052 | 10.1  | 1.05  |
| GBW07108-6         | 0.042 | 10.3  | 0.71  |
| GBW07108-7         | 0.043 | 10.6  | 0.84  |
| GBW07108-8         | 0.046 | 11.7  | 0.86  |
| GBW07108-9         | 0.054 | 13.5  | 0.93  |
| GBW07108-10        | 0.041 | 8.75  | 0.72  |
| GBW07108-11        | 0.048 | 11.7  | 0.94  |
| GBW07108-12        | 0.036 | 10.5  | 0.73  |
| average value      | 0.043 | 10.5  | 0.83  |
| standard deviation | 0.006 | 1.5   | 0.11  |
| RSD%               | 13.2  | 14.3  | 13.8  |
| standard value     | 0.043 | 12    | 0.98  |
| $\Delta\log C$     | 0.002 | -0.06 | -0.07 |

| Sample             | Ag    | B     | Sn     |
|--------------------|-------|-------|--------|
| GBW07427-1         | 0.086 | 61.3  | 2.83   |
| GBW07427-2         | 0.074 | 58.3  | 2.93   |
| GBW07427-3         | 0.074 | 56.7  | 3.13   |
| GBW07427-4         | 0.078 | 53    | 3.17   |
| GBW07427-5         | 0.074 | 51.3  | 2.92   |
| GBW07427-6         | 0.071 | 53.7  | 3.6    |
| GBW07427-7         | 0.078 | 59.3  | 3.87   |
| GBW07427-8         | 0.078 | 54.3  | 3.21   |
| GBW07427-9         | 0.08  | 51.5  | 3.16   |
| GBW07427-10        | 0.076 | 60.7  | 3.02   |
| GBW07427-11        | 0.083 | 52.6  | 2.96   |
| GBW07427-12        | 0.082 | 60    | 3.49   |
| average value      | 0.078 | 56.1  | 3.19   |
| standard deviation | 0.004 | 3.74  | 0.31   |
| RSD%               | 5.61  | 6.68  | 9.8    |
| standard value     | 0.067 | 53    | 3.3    |
| $\Delta\log C$     | 0.065 | 0.024 | -0.015 |

Note: 1. The formula for calculating the detection limit in the table is  $X = \text{blank average measurement} - \text{matrix blank} + 3S$ ; the same formula applies to other annex tables.

2. Due to the high background of the selected buffer's composition, attributed to the blank of potassium pyrosulfate reagent, the blank measurement values in the table were elevated. In subsequent batches of buffer preparation, the potassium pyrosulfate manufacturer was changed.

3. GBW07108 is a marl with a carbonate content exceeding 70%.

**Schedule 2. CCD-1 direct-reading emission spectrometer tests experimental data for newly developed carrier buffer agents**

| Sample       | Ag   | B   | Sn   |
|--------------|------|-----|------|
| GBW07307a-1  | 0.91 | 201 | 2.16 |
| GBW07307a-2  | 0.96 | 184 | 2.11 |
| GBW07307a-3  | 0.89 | 194 | 1.94 |
| GBW07307a-4  | 1.03 | 184 | 1.97 |
| GBW07307a-5  | 1.07 | 188 | 2.02 |
| GBW07307a-6  | 0.97 | 195 | 1.92 |
| GBW07307a-7  | 1.11 | 194 | 2.09 |
| GBW07307a-8  | 0.94 | 244 | 2.03 |
| GBW07307a-9  | 0.97 | 228 | 2.13 |
| GBW07307a-10 | 1.05 | 180 | 2.17 |
| GBW07307a-11 | 1.12 | 165 | 2.15 |
| GBW07307a-12 | 1.00 | 180 | 1.99 |

| Sample      | Ag    | B   | Sn   |
|-------------|-------|-----|------|
| GBW07449-1  | 0.067 | 184 | 1.42 |
| GBW07449-2  | 0.073 | 160 | 1.41 |
| GBW07449-3  | 0.058 | 173 | 1.24 |
| GBW07449-4  | 0.070 | 153 | 1.43 |
| GBW07449-5  | 0.064 | 181 | 1.30 |
| GBW07449-6  | 0.068 | 147 | 1.33 |
| GBW07449-7  | 0.065 | 172 | 1.21 |
| GBW07449-8  | 0.062 | 187 | 1.31 |
| GBW07449-9  | 0.067 | 166 | 1.38 |
| GBW07449-10 | 0.075 | 162 | 1.48 |
| GBW07449-11 | 0.063 | 152 | 1.38 |
| GBW07449-12 | 0.067 | 177 | 1.34 |

|                    |        |        |        |
|--------------------|--------|--------|--------|
| average value      | 1.00   | 195    | 2.06   |
| standard deviation | 0.07   | 21.8   | 0.09   |
| RSD%               | 7.42   | 11.2   | 4.35   |
| standard value     | 1.20   | 195    | 2.50   |
| $\Delta\log C$     | -0.079 | -0.001 | -0.085 |

|                    |        |       |        |
|--------------------|--------|-------|--------|
| average value      | 0.067  | 168   | 1.35   |
| standard deviation | 0.005  | 13.2  | 0.080  |
| RSD%               | 7.06   | 7.9   | 5.89   |
| standard value     | 0.068  | 143   | 1.40   |
| $\Delta\log C$     | -0.009 | 0.070 | -0.015 |

| Sample             | Ag     | B     | Sn     |
|--------------------|--------|-------|--------|
| GBW07309-1         | 0.087  | 63.8  | 2.59   |
| GBW07309-2         | 0.089  | 55.2  | 2.37   |
| GBW07309-3         | 0.088  | 63.2  | 2.19   |
| GBW07309-4         | 0.083  | 53.5  | 2.60   |
| GBW07309-5         | 0.082  | 59.6  | 2.39   |
| GBW07309-6         | 0.095  | 66.4  | 2.06   |
| GBW07309-7         | 0.088  | 60.7  | 2.65   |
| GBW07309-8         | 0.088  | 61.3  | 2.98   |
| GBW07309-9         | 0.084  | 62.8  | 2.45   |
| GBW07309-10        | 0.084  | 56.8  | 2.85   |
| GBW07309-11        | 0.094  | 63.9  | 2.50   |
| GBW07309-12        | 0.085  | 63.6  | 2.64   |
| average value      | 0.087  | 60.9  | 2.52   |
| standard deviation | 0.004  | 3.93  | 0.26   |
| RSD%               | 4.67   | 6.46  | 10.20  |
| standard value     | 0.089  | 54.0  | 2.60   |
| $\Delta\log C$     | -0.009 | 0.052 | -0.013 |

| Sample             | Ag    | B      | Sn    |
|--------------------|-------|--------|-------|
| GBW07132           | 0.019 | 3.16   | 0.39  |
| GBW07132           | 0.019 | 3.31   | 0.47  |
| GBW07132           | 0.019 | 3.00   | 0.36  |
| GBW07132           | 0.026 | 3.76   | 0.45  |
| GBW07132           | 0.029 | 3.10   | 0.44  |
| GBW07132           | 0.029 | 3.04   | 0.44  |
| GBW07132           | 0.019 | 3.30   | 0.46  |
| GBW07132           | 0.019 | 2.38   | 0.48  |
| GBW07132           | 0.017 | 2.76   | 0.48  |
| GBW07132           | 0.017 | 4.68   | 0.31  |
| GBW07132           | 0.019 | 3.81   | 0.48  |
| GBW07132           | 0.019 | 2.77   | 0.55  |
| average value      | 0.021 | 3.25   | 0.44  |
| standard deviation | 0.005 | 0.60   | 0.06  |
| RSD%               | 21.7  | 18.5   | 14.5  |
| standard value     | 0.03  | 4.00   | 0.60  |
| $\Delta\log C$     | -0.16 | -0.090 | -0.13 |

Note: GBW07132 is a carbonate rock with a carbonate content exceeding 90%; its certified value is below the detection limit of the buffer solution.

**Schedule 3. CCD-1 direct-reading emission spectrometer tests experimental data for newly developed carrier buffer agents**

| Sample             | Ag    | B     | Sn     |
|--------------------|-------|-------|--------|
| GBW07318-1         | 0.17  | 32.9  | 9.23   |
| GBW07318-2         | 0.17  | 34.3  | 8.83   |
| GBW07318-3         | 0.17  | 31.5  | 7.98   |
| GBW07318-4         | 0.15  | 29.0  | 9.34   |
| GBW07318-5         | 0.15  | 27.4  | 9.64   |
| GBW07318-6         | 0.17  | 28.6  | 11.1   |
| GBW07318-7         | 0.16  | 31.3  | 9.46   |
| GBW07318-8         | 0.15  | 30.5  | 11.1   |
| GBW07318-9         | 0.15  | 28.3  | 8.96   |
| GBW07318-10        | 0.16  | 27.2  | 9.21   |
| GBW07318-11        | 0.18  | 28.6  | 9.20   |
| GBW07318-12        | 0.16  | 25.8  | 8.01   |
| average value      | 0.16  | 29.6  | 9.34   |
| standard deviation | 0.01  | 2.51  | 0.98   |
| RSD%               | 6.88  | 8.5   | 10.5   |
| standard value     | 0.15  | 29.0  | 9.50   |
| $\Delta\log C$     | 0.030 | 0.009 | -0.007 |

| Sample             | Ag    | B     | Sn    |
|--------------------|-------|-------|-------|
| GBW07134           | 0.044 | 1.87  | 0.70  |
| GBW07134           | 0.040 | 1.97  | 0.73  |
| GBW07134           | 0.042 | 2.00  | 0.71  |
| GBW07134           | 0.038 | 1.90  | 0.56  |
| GBW07134           | 0.045 | 1.99  | 0.75  |
| GBW07134           | 0.031 | 1.70  | 0.72  |
| GBW07134           | 0.046 | 1.89  | 0.71  |
| GBW07134           | 0.030 | 2.34  | 0.76  |
| GBW07134           | 0.049 | 1.81  | 0.70  |
| GBW07134           | 0.041 | 2.00  | 0.69  |
| GBW07134           | 0.047 | 1.60  | 0.50  |
| GBW07134           | 0.046 | 2.01  | 0.73  |
| average value      | 0.041 | 1.92  | 0.69  |
| standard deviation | 0.006 | 0.18  | 0.08  |
| RSD%               | 14.4  | 9.6   | 11.3  |
| standard value     | 0.050 | 2.30  | 0.90  |
| $\Delta\log C$     | -0.08 | -0.08 | -0.12 |

| Sample     | Ag   | B    | Sn    |
|------------|------|------|-------|
| GBW07360-1 | 0.58 | 78.6 | 10.00 |
| GBW07360-2 | 0.71 | 72.7 | 6.96  |
| GBW07360-3 | 0.79 | 81.5 | 9.06  |
| GBW07360-4 | 0.74 | 66.7 | 7.61  |
| GBW07360-5 | 0.82 | 79   | 7.02  |
| GBW07360-6 | 0.62 | 69.2 | 7.16  |

| Sample   | Ag    | B    | Sn   |
|----------|-------|------|------|
| GBW07329 | 0.073 | 19.5 | 2.13 |
| GBW07329 | 0.066 | 22.1 | 2.09 |
| GBW07329 | 0.068 | 19.7 | 2.16 |
| GBW07329 | 0.078 | 18.1 | 2.09 |
| GBW07329 | 0.072 | 16.9 | 2.07 |
| GBW07329 | 0.078 | 20.5 | 2.13 |



|                    |        |       |       |
|--------------------|--------|-------|-------|
| GBW07360-7         | 0.71   | 77    | 6.85  |
| GBW07360-8         | 0.58   | 76.6  | 6.90  |
| GBW07360-9         | 0.72   | 71.2  | 6.58  |
| GBW07360-10        | 0.90   | 102   | 6.50  |
| GBW07360-11        | 0.83   | 83.4  | 6.71  |
| GBW07360-12        | 0.79   | 65.8  | 6.90  |
| average value      | 0.73   | 76.9  | 7.35  |
| standard deviation | 0.10   | 9.6   | 1.07  |
| RSD%               | 13.7   | 12.5  | 14.6  |
| standard value     | 0.74   | 68.0  | 7.20  |
| $\Delta\log C$     | -0.005 | 0.053 | 0.009 |

|                    |       |        |       |
|--------------------|-------|--------|-------|
| GBW07329           | 0.066 | 21.0   | 2.21  |
| GBW07329           | 0.075 | 22.7   | 2.03  |
| GBW07329           | 0.076 | 16.7   | 2.39  |
| GBW07329           | 0.076 | 23.0   | 2.27  |
| GBW07329           | 0.077 | 21.8   | 2.80  |
| GBW07329           | 0.067 | 17.6   | 2.12  |
| average value      | 0.073 | 20.0   | 2.21  |
| standard deviation | 0.005 | 2.25   | 0.21  |
| RSD%               | 6.52  | 11.3   | 9.54  |
| standard value     | 0.067 | 20.0   | 3.30  |
| $\Delta\log C$     | 0.035 | -0.001 | -0.17 |

Note: GBW07134 is a carbonate rock with a carbonate content exceeding 90%.

**Schedule 4. AES-7200 direct-reading emission spectrometer tests experimental data for newly developed carrier buffer agents**

| Sample | Ag    | Sn   | B    |
|--------|-------|------|------|
| KB-1   | 0.027 | 0.85 | 3.15 |
| KB-2   | 0.027 | 0.73 | 3    |
| KB-3   | 0.026 | 0.73 | 3.67 |
| KB-4   | 0.026 | 0.72 | 3.34 |
| KB-5   | 0.033 | 0.71 | 3.08 |
| KB-6   | 0.032 | 0.72 | 3.24 |
| KB-7   | 0.031 | 0.71 | 3.06 |
| KB-8   | 0.032 | 0.7  | 3.02 |
| KB-9   | 0.031 | 0.7  | 4.05 |

| Sample     | Ag    | Sn   | B    |
|------------|-------|------|------|
| GBW07108-1 | 0.040 | 0.66 | 20.8 |
| GBW07108-2 | 0.045 | 1.01 | 17.2 |
| GBW07108-3 | 0.042 | 0.88 | 12.8 |
| GBW07108-4 | 0.048 | 0.84 | 13.4 |
| GBW07108-5 | 0.043 | 0.71 | 12.5 |
| GBW07108-6 | 0.045 | 0.76 | 15.1 |
| GBW07108-7 | 0.054 | 0.78 | 15.2 |
| GBW07108-8 | 0.046 | 0.71 | 12.0 |
| GBW07108-9 | 0.048 | 0.76 | 19.5 |

|                          |        |       |      |
|--------------------------|--------|-------|------|
| KB-10                    | 0.031  | 0.69  | 3.52 |
| KB-11                    | 0.031  | 0.69  | 3.01 |
| KB-12                    | 0.03   | 0.69  | 3.69 |
| standard deviation       | 0.0025 | 0.043 | 0.34 |
| average value            | 0.03   | 0.72  | 3.32 |
| 3S                       | 0.008  | 0.13  | 1.02 |
| The detection limit (6S) | 0.016  | 0.26  | 2.04 |
| Detection lower limit    | 0.024  | 0.75  | 4.22 |

|                     |       |        |        |
|---------------------|-------|--------|--------|
| GBW07108-10         | 0.052 | 1.02   | 17.6   |
| GBW07108-11         | 0.046 | 0.69   | 13.5   |
| GBW07108-12         | 0.053 | 0.84   | 13.5   |
| standard value      | 0.043 | 0.98   | 16.0   |
| average value       | 0.047 | 0.81   | 15.3   |
| standard deviation  | 0.004 | 0.12   | 2.88   |
| RSD%                | 9.37  | 14.7   | 18.9   |
| $\Delta\text{LogC}$ | 0.037 | -0.085 | -0.021 |

| Sample              | Ag    | Sn     | B     |
|---------------------|-------|--------|-------|
| GBW07408-1          | 0.065 | 2.47   | 65.1  |
| GBW07408-2          | 0.052 | 2.31   | 51.4  |
| GBW07408-3          | 0.056 | 2.31   | 62.1  |
| GBW07408-4          | 0.064 | 2.64   | 51.8  |
| GBW07408-5          | 0.053 | 2.47   | 61.4  |
| GBW07408-6          | 0.052 | 2.34   | 58.8  |
| GBW07408-7          | 0.058 | 2.45   | 59.8  |
| GBW07408-8          | 0.051 | 2.37   | 57.5  |
| GBW07408-9          | 0.077 | 3.08   | 66.7  |
| GBW07408-10         | 0.067 | 2.40   | 56.4  |
| GBW07408-11         | 0.070 | 2.56   | 62.4  |
| GBW07408-12         | 0.058 | 2.12   | 61.6  |
| average value       | 0.060 | 2.46   | 59.6  |
| standard deviation  | 0.008 | 0.24   | 4.71  |
| RSD%                | 13.97 | 9.60   | 7.91  |
| standard value      | 0.060 | 2.80   | 54.0  |
| $\Delta\text{logC}$ | 0.002 | -0.056 | 0.043 |

| Sample              | Ag    | Sn     | B    |
|---------------------|-------|--------|------|
| GBW07450-1          | 0.088 | 1.99   | 60   |
| GBW07450-2          | 0.094 | 2.46   | 54   |
| GBW07450-3          | 0.094 | 2.41   | 54   |
| GBW07450-4          | 0.11  | 2.57   | 53   |
| GBW07450-5          | 0.093 | 2.22   | 61   |
| GBW07450-6          | 0.11  | 2.73   | 55   |
| GBW07450-7          | 0.10  | 2.45   | 52   |
| GBW07450-8          | 0.11  | 2.62   | 55   |
| GBW07450-9          | 0.10  | 2.30   | 61   |
| GBW07450-10         | 0.090 | 1.85   | 60   |
| GBW07450-11         | 0.094 | 2.18   | 53   |
| GBW07450-12         | 0.10  | 2.01   | 57   |
| average value       | 0.10  | 2.32   | 56.1 |
| standard deviation  | 0.007 | 0.27   | 3.26 |
| RSD%                | 7.32  | 11.80  | 5.80 |
| standard value      | 0.08  | 2.40   | 48.0 |
| $\Delta\text{logC}$ | 0.082 | -0.016 | 0.07 |

**Schedule 5. AES-7200 direct-reading emission spectrometer tests experimental data for newly developed carrier buffer agents**

| Sample             | Ag    | Sn    | B     |
|--------------------|-------|-------|-------|
| GBW07423-1         | 0.092 | 3.27  | 60.2  |
| GBW07423-2         | 0.090 | 3.54  | 55.8  |
| GBW07423-3         | 0.12  | 4.03  | 61.1  |
| GBW07423-4         | 0.11  | 4.09  | 54.8  |
| GBW07423-5         | 0.090 | 3.57  | 63.8  |
| GBW07423-6         | 0.11  | 4.04  | 54.5  |
| GBW07423-7         | 0.10  | 3.71  | 49.1  |
| GBW07423-8         | 0.10  | 3.76  | 51.7  |
| GBW07423-9         | 0.10  | 3.43  | 59.5  |
| GBW07423-10        | 0.10  | 3.63  | 54.9  |
| GBW07423-11        | 0.11  | 3.68  | 49.3  |
| GBW07423-12        | 0.10  | 3.36  | 47.7  |
| average value      | 0.10  | 3.68  | 55.2  |
| standard deviation | 0.008 | 0.27  | 5.17  |
| RSD%               | 8.38  | 7.31  | 9.37  |
| standard value     | 0.083 | 3.40  | 52.0  |
| $\Delta\log C$     | 0.086 | 0.034 | 0.026 |

| Sample             | Ag    | Sn     | B     |
|--------------------|-------|--------|-------|
| GBW07451-1         | 0.066 | 2.31   | 63    |
| GBW07451-2         | 0.076 | 2.58   | 65    |
| GBW07451-3         | 0.077 | 2.51   | 62    |
| GBW07451-4         | 0.079 | 2.44   | 66    |
| GBW07451-5         | 0.073 | 2.24   | 65    |
| GBW07451-6         | 0.074 | 3.05   | 62    |
| GBW07451-7         | 0.081 | 2.43   | 64    |
| GBW07451-8         | 0.077 | 2.18   | 64    |
| GBW07451-9         | 0.073 | 2.35   | 64    |
| GBW07451-10        | 0.078 | 2.70   | 60    |
| GBW07451-11        | 0.08  | 2.64   | 64    |
| GBW07451-12        | 0.083 | 2.47   | 59    |
| average value      | 0.08  | 2.49   | 63    |
| standard deviation | 0.005 | 0.23   | 2.22  |
| RSD%               | 5.92  | 9.42   | 3.51  |
| standard value     | 0.074 | 2.60   | 52    |
| $\Delta\log C$     | 0.014 | -0.018 | 0.085 |

| Sample     | Ag    | Sn   | B    |
|------------|-------|------|------|
| GBW07424-1 | 0.090 | 2.80 | 35.9 |
| GBW07424-2 | 0.091 | 2.86 | 34.1 |

| Sample     | Ag    | Sn   | B    |
|------------|-------|------|------|
| GBW07453-1 | 0.093 | 6.65 | 92.8 |
| GBW07453-2 | 0.095 | 7.32 | 89.7 |

|                    |       |        |       |
|--------------------|-------|--------|-------|
| GBW07424-3         | 0.10  | 3.14   | 34.4  |
| GBW07424-4         | 0.10  | 3.28   | 37.4  |
| GBW07424-5         | 0.10  | 2.95   | 39.1  |
| GBW07424-6         | 0.10  | 3.02   | 36.0  |
| GBW07424-7         | 0.12  | 2.85   | 35.2  |
| GBW07424-8         | 0.10  | 3.22   | 34.2  |
| GBW07424-9         | 0.088 | 2.85   | 39.4  |
| GBW07424-10        | 0.12  | 2.91   | 37.4  |
| GBW07424-11        | 0.09  | 2.74   | 31.4  |
| GBW07424-12        | 0.10  | 3.33   | 39.1  |
| average value      | 0.10  | 3.00   | 36.1  |
| standard deviation | 0.010 | 0.20   | 2.44  |
| RSD%               | 9.78  | 6.66   | 6.74  |
| standard value     | 0.083 | 3.40   | 35    |
| $\Delta\log C$     | 0.086 | -0.055 | 0.014 |

|                    |        |       |       |
|--------------------|--------|-------|-------|
| GBW07453-3         | 0.076  | 6.58  | 92.8  |
| GBW07453-4         | 0.089  | 7.05  | 95.2  |
| GBW07453-5         | 0.085  | 7.06  | 82.0  |
| GBW07453-6         | 0.088  | 6.68  | 83.7  |
| GBW07453-7         | 0.074  | 6.56  | 91.3  |
| GBW07453-8         | 0.087  | 6.97  | 89.3  |
| GBW07453-9         | 0.091  | 7.81  | 86.4  |
| GBW07453-10        | 0.078  | 6.27  | 90.4  |
| GBW07453-11        | 0.073  | 6.30  | 102   |
| GBW07453-12        | 0.081  | 6.19  | 89.1  |
| average value      | 0.08   | 6.79  | 90.4  |
| standard deviation | 0.01   | 0.48  | 5.18  |
| RSD%               | 9.00   | 7.02  | 5.73  |
| standard value     | 0.092  | 6.20  | 83.0  |
| $\Delta\log C$     | -0.039 | 0.039 | 0.037 |

**Schedule 6. AES-7200 direct-reading emission spectrometer tests experimental data for newly developed carrier buffer agents**

| Sample     | Ag    | Sn   | B    |
|------------|-------|------|------|
| GBW07425-1 | 0.097 | 2.74 | 37.5 |
| GBW07425-2 | 0.099 | 3.61 | 34.0 |
| GBW07425-3 | 0.10  | 2.76 | 40.2 |
| GBW07425-4 | 0.11  | 2.76 | 38.1 |
| GBW07425-5 | 0.11  | 3.31 | 31.8 |

| Sample     | Ag    | Sn   | B    |
|------------|-------|------|------|
| GBW07454-1 | 0.066 | 2.32 | 69.6 |
| GBW07454-2 | 0.094 | 3.29 | 66.6 |
| GBW07454-3 | 0.072 | 2.76 | 75.0 |
| GBW07454-4 | 0.065 | 2.39 | 75.4 |
| GBW07454-5 | 0.076 | 2.86 | 60.8 |

|                    |       |       |       |
|--------------------|-------|-------|-------|
| GBW07425-6         | 0.12  | 3.55  | 31.6  |
| GBW07425-7         | 0.097 | 3.52  | 41.2  |
| GBW07425-8         | 0.10  | 2.91  | 39.6  |
| GBW07425-9         | 0.12  | 3.02  | 39.0  |
| GBW07425-10        | 0.11  | 3.11  | 44.4  |
| GBW07425-11        | 0.10  | 3.11  | 34.9  |
| GBW07425-12        | 0.13  | 3.17  | 42.6  |
| average value      | 0.11  | 3.13  | 37.9  |
| standard deviation | 0.010 | 0.31  | 4.12  |
| RSD%               | 9.092 | 10.01 | 10.9  |
| standard value     | 0.098 | 3.1   | 36.0  |
| $\Delta\log C$     | 0.042 | 0.004 | 0.022 |

|                    |       |        |      |
|--------------------|-------|--------|------|
| GBW07454-6         | 0.085 | 2.76   | 67.7 |
| GBW07454-7         | 0.087 | 3.11   | 71.5 |
| GBW07454-8         | 0.081 | 2.65   | 69.1 |
| GBW07454-9         | 0.072 | 2.44   | 68.5 |
| GBW07454-10        | 0.076 | 2.67   | 68.7 |
| GBW07454-11        | 0.10  | 2.92   | 67.3 |
| GBW07454-12        | 0.075 | 2.42   | 71.6 |
| average value      | 0.079 | 2.72   | 69.3 |
| standard deviation | 0.011 | 0.30   | 3.90 |
| RSD%               | 13.6  | 11.01  | 5.62 |
| standard value     | 0.070 | 2.90   | 54.0 |
| $\Delta\log C$     | 0.053 | -0.028 | 0.11 |

| Sample        | Ag    | Sn   | B    |
|---------------|-------|------|------|
| GBW07426-1    | 0.11  | 2.71 | 73.8 |
| GBW07426-2    | 0.12  | 2.80 | 61.9 |
| GBW07426-3    | 0.12  | 2.93 | 65.6 |
| GBW07426-4    | 0.11  | 2.84 | 59.0 |
| GBW07426-5    | 0.12  | 3.10 | 58.4 |
| GBW07426-6    | 0.10  | 2.70 | 58.7 |
| GBW07426-7    | 0.093 | 2.38 | 73.9 |
| GBW07426-8    | 0.11  | 2.35 | 67.6 |
| GBW07426-9    | 0.10  | 2.76 | 62.0 |
| GBW07426-10   | 0.11  | 2.85 | 64.3 |
| GBW07426-11   | 0.11  | 2.58 | 60.6 |
| GBW07426-12   | 0.12  | 3.23 | 58.8 |
| average value | 0.11  | 2.77 | 63.7 |

| Sample        | Ag    | Sn   | B    |
|---------------|-------|------|------|
| GBW07455-1    | 0.068 | 2.59 | 69.7 |
| GBW07455-2    | 0.066 | 2.51 | 65.6 |
| GBW07455-3    | 0.072 | 2.70 | 66.0 |
| GBW07455-4    | 0.063 | 2.67 | 64.0 |
| GBW07455-5    | 0.065 | 2.42 | 65.9 |
| GBW07455-6    | 0.068 | 2.56 | 66.8 |
| GBW07455-7    | 0.074 | 2.77 | 61.3 |
| GBW07455-8    | 0.061 | 2.34 | 67.0 |
| GBW07455-9    | 0.082 | 3.12 | 65.8 |
| GBW07455-10   | 0.071 | 2.91 | 64.5 |
| GBW07455-11   | 0.071 | 2.22 | 67.2 |
| GBW07455-12   | 0.079 | 2.64 | 62.2 |
| average value | 0.070 | 2.62 | 65.5 |

|                    |       |        |       |
|--------------------|-------|--------|-------|
| standard deviation | 0.008 | 0.26   | 5.55  |
| RSD%               | 7.70  | 9.31   | 8.71  |
| standard value     | 0.09  | 2.80   | 55.0  |
| $\Delta\log C$     | 0.11  | -0.005 | 0.064 |

|                    |       |        |       |
|--------------------|-------|--------|-------|
| standard deviation | 0.006 | 0.25   | 2.26  |
| RSD%               | 8.89  | 9.35   | 3.46  |
| standard value     | 0.070 | 2.8    | 52.0  |
| $\Delta\log C$     | 0.000 | -0.029 | 0.100 |

**Schedule7. AES-7200 direct-reading emission spectrometer tests experimental data for newly developed carrier buffer agents**

| Sample             | Ag    | Sn   | B    |
|--------------------|-------|------|------|
| GBW07448-1         | 0.058 | 2.62 | 55   |
| GBW07448-2         | 0.055 | 2.52 | 55   |
| GBW07448-3         | 0.065 | 2.37 | 53   |
| GBW07448-4         | 0.063 | 2.42 | 52   |
| GBW07448-5         | 0.054 | 2.38 | 58   |
| GBW07448-6         | 0.056 | 2.61 | 55   |
| GBW07448-7         | 0.065 | 2.85 | 51   |
| GBW07448-8         | 0.048 | 1.97 | 52   |
| GBW07448-9         | 0.052 | 2.48 | 56   |
| GBW07448-10        | 0.06  | 2.69 | 52   |
| GBW07448-11        | 0.065 | 2.81 | 52   |
| GBW07448-12        | 0.072 | 2.94 | 49   |
| average value      | 0.059 | 2.56 | 53   |
| Standard deviation | 0.007 | 0.26 | 2.54 |
| RSD%               | 11.4  | 10.3 | 4.78 |
| standard value     | 0.05  | 2.3  | 51   |

| Sample             | Ag    | Sn   | B    |
|--------------------|-------|------|------|
| GBW07456-1         | 0.11  | 3.74 | 74   |
| GBW07456-2         | 0.14  | 3.45 | 77   |
| GBW07456-3         | 0.16  | 4.54 | 79   |
| GBW07456-4         | 0.14  | 4.02 | 84   |
| GBW07456-5         | 0.14  | 3.47 | 84   |
| GBW07456-6         | 0.16  | 3.9  | 80   |
| GBW07456-7         | 0.16  | 4.19 | 83   |
| GBW07456-8         | 0.14  | 3.42 | 78   |
| GBW07456-9         | 0.15  | 3.42 | 83   |
| GBW07456-10        | 0.15  | 3.57 | 85   |
| GBW07456-11        | 0.15  | 4.13 | 80   |
| GBW07456-12        | 0.14  | 4.01 | 82   |
| average value      | 0.14  | 3.82 | 81   |
| standard deviation | 0.014 | 0.37 | 3.28 |
| RSD%               | 9.42  | 9.61 | 4.06 |
| standard value     | 0.14  | 4    | 64   |

|                |      |       |      |  |                |       |       |     |
|----------------|------|-------|------|--|----------------|-------|-------|-----|
| $\Delta\log C$ | 0.07 | 0.046 | 0.02 |  | $\Delta\log C$ | 0.011 | -0.02 | 0.1 |
|----------------|------|-------|------|--|----------------|-------|-------|-----|

| Sample             | Ag    | Sn    | B     | Sample             | Ag     | Sn    | B     |
|--------------------|-------|-------|-------|--------------------|--------|-------|-------|
| GBW07449-1         | 0.077 | 1.82  | 181   | GBW07457-1         | 0.14   | 9.74  | 95.8  |
| GBW07449-2         | 0.083 | 1.94  | 171   | GBW07457-2         | 0.11   | 9.69  | 93.3  |
| GBW07449-3         | 0.068 | 1.53  | 174   | GBW07457-3         | 0.12   | 9.58  | 99.6  |
| GBW07449-4         | 0.083 | 1.81  | 174   | GBW07457-4         | 0.12   | 9.09  | 88.5  |
| GBW07449-5         | 0.064 | 1.62  | 179   | GBW07457-5         | 0.12   | 8.71  | 93.4  |
| GBW07449-6         | 0.085 | 1.78  | 178   | GBW07457-6         | 0.11   | 9.54  | 90.2  |
| GBW07449-7         | 0.081 | 1.54  | 182   | GBW07457-7         | 0.11   | 9.02  | 87.9  |
| GBW07449-8         | 0.081 | 1.76  | 168   | GBW07457-8         | 0.11   | 9.36  | 79.1  |
| GBW07449-9         | 0.073 | 1.75  | 194   | GBW07457-9         | 0.1    | 8.86  | 101.4 |
| GBW07449-10        | 0.088 | 2.16  | 174   | GBW07457-10        | 0.1    | 8.79  | 95.4  |
| GBW07449-11        | 0.084 | 2.04  | 174   | GBW07457-11        | 0.12   | 9.14  | 94.1  |
| GBW07449-12        | 0.092 | 2.45  | 168   | GBW07457-12        | 0.11   | 9.84  | 90.8  |
| average value      | 0.08  | 1.85  | 176   | average value      | 0.11   | 9.28  | 92.5  |
| standard deviation | 0.01  | 0.27  | 7.21  | standard deviation | 0.01   | 0.4   | 5.85  |
| RSD%               | 10.2  | 14.4  | 4.09  | RSD%               | 8.04   | 4.26  | 6.33  |
| standard value     | 0.07  | 1.8   | 143   | standard value     | 0.13   | 8.7   | 80    |
| $\Delta\log C$     | 0.07  | 0.012 | 0.091 | $\Delta\log C$     | -0.062 | 0.028 | 0.063 |
